# Supplementary material
Source: PubMed Central journal article supplement (PMC2555963)
Supplement: E08-02-0220_1.pdf [file E08-02-0220_1.pdf]

## Supplementary Information

The myosin V motor requires the Rab GTPases Ypt31/32 for its cellular localization.  
Lipatova *et al.*

Table S1. Yeast strains and plasmids used in this study

### A. Strains

| Strain  | Alias       | Genotype                                                                                                | Source*                         |
|---------|-------------|---------------------------------------------------------------------------------------------------------|---------------------------------|
| NSY468  | PJ69-4A     | <i>MATa trp1-901 leu2-3,112 ura3-52 his3-200 gal4Δ gal80Δ gal2-ade2 lys2::gal1-his3 met2::gal7-lacZ</i> | (James <i>et al.</i> , 1996)    |
| NSY752  | PJ69-4α     | <i>MATα trp1-901 leu2-3,112 ura3-52 his3-200 gal4Δ gal80Δ gal2-ade2 lys2::gal1-his3 met2::gal7-lacZ</i> | (James <i>et al.</i> , 1996)    |
| NSY125  | DBY1034     | <i>MATa his4-539 lys2-801 ura3-52</i>                                                                   | (Jedd <i>et al.</i> , 1997)     |
| NSY348  | Ypt31Δ/32ts | NSY125 <i>ypt31Δ::HIS3 ypt32-A141D</i>                                                                  | (Jedd <i>et al.</i> , 1997)     |
| NSY160  |             | <i>MATα lys2-801 ura3-52 his4-539</i>                                                                   | (Jedd <i>et al.</i> , 1995)     |
| NSY161  | Ypt1ts      | NSY160 <i>ypt1-A136D</i>                                                                                | (Jedd <i>et al.</i> , 1995)     |
| NY786   | Sec15ts     | <i>MATa, ura3-52 his4-619 sec15-1</i>                                                                   | (Gimeno <i>et al.</i> , 1995)   |
| NSY1175 | LWY2947     | <i>MATa ura3-52 leu2-3,112 his3-Δ200 trp1-901 lys2-801 suc2-Δ9 myo2Δ::TRP1, pMYO2</i>                   | (Catlett and Weisman, 1998)     |
| NSY1168 | LWY3225     | LWY2947+pRS413- <i>MYO2</i>                                                                             | (Catlett and Weisman, 1998)     |
| NSY1169 | LWY7488     | LWY2947+pRS413- <i>MYO2-Y1415E</i>                                                                      | (Pashkova <i>et al.</i> , 2006) |
| NSY1171 | LWY7522     | LWY2947+pRS413- <i>MYO2-K1444A</i>                                                                      | (Pashkova <i>et al.</i> , 2006) |
| NSY1172 | LWY7523     | LWY2947+pRS413- <i>MYO2-L1331S</i>                                                                      | (Pashkova <i>et al.</i> , 2006) |
| NSY1173 | LWY7524     | LWY2947+pRS413- <i>MYO2-Q1447R</i>                                                                      | (Pashkova <i>et al.</i> , 2006) |
| NSY1174 | LWY7540     | LWY2947+pRS413- <i>MYO2-L1411S</i>                                                                      | (Pashkova <i>et al.</i> , 2006) |
| NSY1268 |             | LWY2947+pRS413- <i>MYO2-HA</i>                                                                          | (Pashkova <i>et al.</i> , 2006) |
| NSY1269 |             | LWY2947+pRS413- <i>MYO2-Y1415E-HA</i>                                                                   | (Pashkova <i>et al.</i> , 2006) |
|         |             | LWY2947+pRS413- <i>MYO2-Y1415R</i>                                                                      |                                 |
|         |             | LWY2947+pRS413- <i>MYO2-YPT32</i>                                                                       |                                 |
|         |             | LWY2947+pRS413- <i>MYO2-Y1415R-YPT32</i>                                                                |                                 |

**B. Plasmids**

| Plasmid | Alias    | Genotype                                 | Source*                       |
|---------|----------|------------------------------------------|-------------------------------|
| pNS196  | pACT2    | 2 $\mu$ , <i>LEU2</i> , Amp <sup>r</sup> | Clontech, CA                  |
| pNS1019 |          | pACT2- <i>MYO2</i> -GTD                  |                               |
| pNS1024 |          | pACT2- <i>MYO2-K1444A</i> -GTD           |                               |
| pNS1022 |          | pACT2- <i>MYO2-L1331S</i> -GTD           |                               |
| pNS1023 |          | pACT2- <i>MYO2-L1411S</i> -GTD           |                               |
| pNS1021 |          | pACT2- <i>MYO2-Q1447R</i> -GTD           |                               |
| pNS1020 |          | pACT2- <i>MYO2-Y1415E</i> -GTD           |                               |
| pNS459  |          | pACT2- <i>YPT32-Q72L</i>                 |                               |
| pNS462  |          | pACT2- <i>YPT32-Q72L-SS</i>              |                               |
| pNS1078 |          | pACT2- <i>YPT31</i>                      |                               |
| pNS1079 |          | pACT2- <i>YPT31-Q72L</i>                 |                               |
| pNS1080 |          | pACT2- <i>YPT31-S27N</i>                 |                               |
| pNS1081 |          | pACT- <i>YPT31-D129N</i>                 |                               |
| pNS738  |          | pACT2- <i>YPT31-SS</i>                   |                               |
| pNS448  | pAS1     | 2 $\mu$ , <i>TRP1</i> , Amp <sup>r</sup> | (Durfee <i>et al.</i> , 1993) |
| pNS657  |          | pAS1- <i>YPT1</i>                        | (Calero and Collins, 2002)    |
| pNS653  |          | pAS1- <i>YPT6</i>                        | (Calero and Collins, 2002)    |
| pNS645  |          | pAS1- <i>YPT31</i>                       | (Calero and Collins, 2002)    |
| pNS647  |          | pAS1- <i>YPT32</i>                       | (Calero and Collins, 2002)    |
| pNS206  | pGBDU-C2 | 2 $\mu$ , <i>URA3</i> , Amp <sup>r</sup> | (James <i>et al.</i> , 1996)  |
| pNS288  |          | pGBDU-C2- <i>YPT32-SS</i>                | (Chen <i>et al.</i> , 2005)   |
| pNS289  |          | pGBDU-C2- <i>YPT32-Q72L-SS</i>           | (Chen <i>et al.</i> , 2005)   |
| pNS290  |          | pGBDU-C2- <i>YPT32-S27N-SS</i>           | (Chen <i>et al.</i> , 2005)   |
| pNS291  |          | pGBDU-C2- <i>YPT32-D129N-SS</i>          |                               |

|         |                             |                                                    |                                     |
|---------|-----------------------------|----------------------------------------------------|-------------------------------------|
| pNS1027 |                             | pGBDU-C2- <i>MYO2</i> -GTD                         |                                     |
| pNS255  | pGEX-KG                     | Amp <sup>r</sup> , GST                             | (Guan and Dixon, 1991)              |
| pNS296  |                             | pGEX-KG- <i>YPT32</i>                              | (Jones <i>et al.</i> , 2000)        |
| pNS734  | pGEX-4T-1- <i>MYO2</i> -GTD | Amp <sup>r</sup> , GST- <i>MYO2</i> -GTD           | (Pashkova <i>et al.</i> , 2005)     |
| pNS1082 | pQE9- <i>YPT1</i>           | Amp <sup>r</sup> , HIS <sub>6</sub> - <i>YPT1</i>  | (Lupashin and Waters, 1997)         |
| pNS619  | pTrcHisA- <i>YPT31</i>      | Amp <sup>r</sup> , HIS <sub>6</sub> - <i>YPT31</i> |                                     |
| PNS620  | pTrcHisA- <i>YPT32</i>      | Amp <sup>r</sup> , HIS <sub>6</sub> - <i>YPT32</i> |                                     |
| pNS563  | pRS426                      | 2 $\mu$ , <i>URA3</i>                              | (Christianson <i>et al.</i> , 1992) |
| pNS940  |                             | pRS426- <i>MYO2</i>                                |                                     |
| pNS1085 |                             | pRS426- <i>MYO2-L1411S</i>                         |                                     |
| pNS1086 |                             | pRS426- <i>MYO2-Q1447R</i>                         |                                     |
| pNS1087 |                             | pRS426- <i>MYO2-Y1415E</i>                         |                                     |
| pNS274  | Yep24                       | 2 $\mu$ , <i>URA3</i>                              | (Botstein <i>et al.</i> , 1979)     |
| pNS489  |                             | Yep24- <i>YPT1</i>                                 | (Morozova <i>et al.</i> , 2006)     |
| pNS229  |                             | Yep24- <i>YPT31</i>                                | (Jones <i>et al.</i> , 1999)        |
| pNS1088 | pRS413                      | <i>CEN</i> , <i>HIS3</i> , Amp <sup>r</sup>        | (Sikorski and Hieter, 1989)         |
| pNS1070 |                             | pRS413- <i>MYO2</i> -HA                            | (Pashkova <i>et al.</i> , 2006)     |
| pNS1071 |                             | pRS413- <i>MYO2-Y1415E</i> -HA                     | (Pashkova <i>et al.</i> , 2006)     |
|         |                             | pRS413- <i>MYO2-Y1415R</i>                         | (Pashkova <i>et al.</i> , 2006)     |
|         |                             | pRS413- <i>MYO2-YPT32</i>                          |                                     |
|         |                             | pRS413- <i>MYO2-Y1415R-YPT32</i>                   |                                     |
|         |                             | GFP-SEC4                                           | (Calero <i>et al.</i> , 2003)       |

---

\*All strains and plasmids, if not marked otherwise, were constructed in this study.

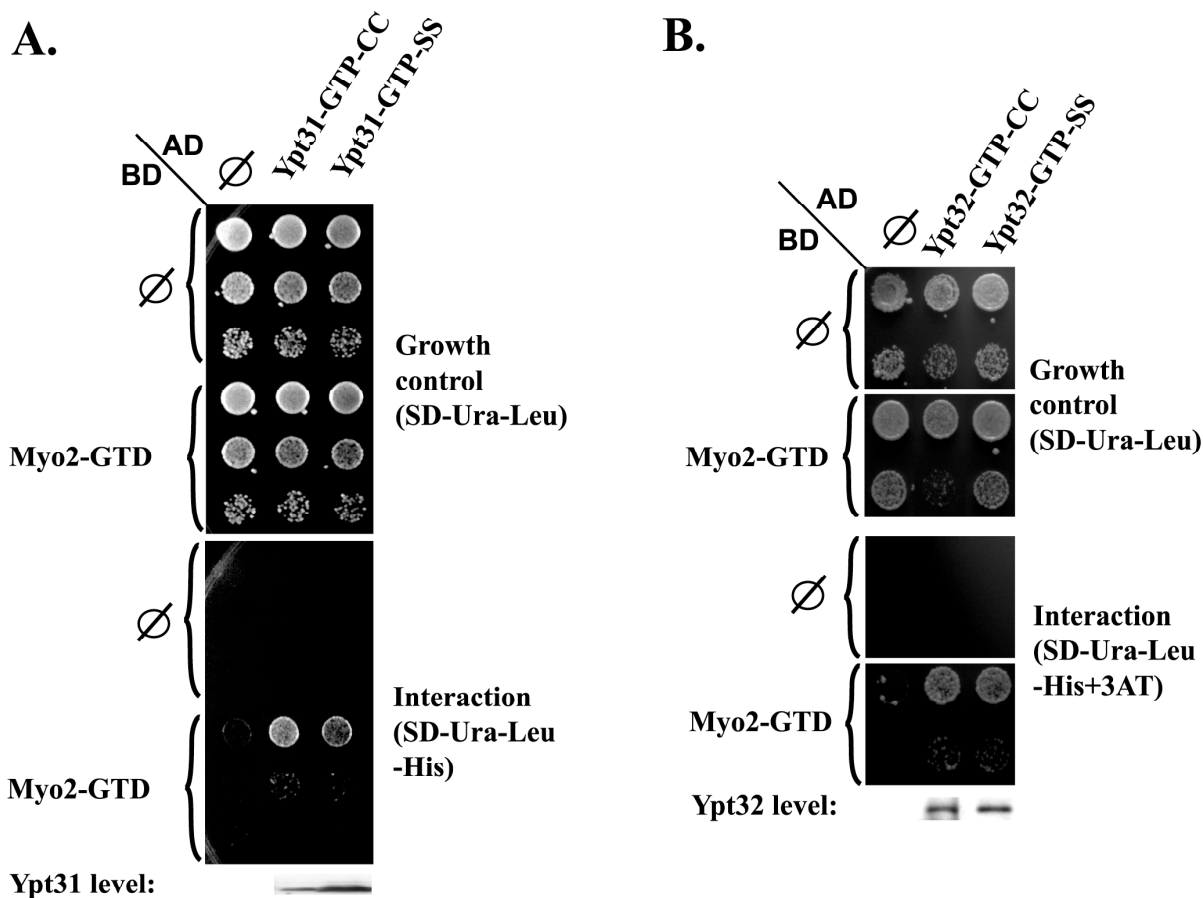

**Figure S1: Prenylation of Ypt31/32 is not required for their interaction with Myo2-GTD.**

**A.** Ypt31 prenylation is not required for its interaction with Myo2-GTD. Replacing the two terminal cysteines (C222, C223) required for prenylation, Ypt31-CC, with serines, Ypt31-SS, does not abolish two-hybrid interaction with Myo2-GTD. The experiment was done as described in Figure 1B. **B.** Ypt32 prenylation is not required for the interaction with Myo2-GTD. Replacing the two terminal cysteines (C221, C222) required for prenylation, Ypt32-GTP-CC, with serines, Ypt32-GTP-SS, does not abolish two-hybrid interaction with Myo2-GTD. The experiment was done as described in Figure 1C. Results shown in this figure represent at least two experiments.

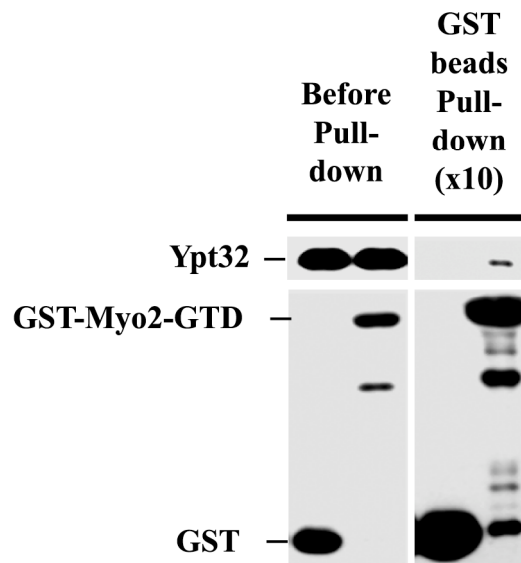

**Figure S2. Direct physical interaction of bacterially expressed Ypt32 and Myo2-GTD.**

Bacterially expressed GST-tagged Myo2-GTD or GST, as a negative control, were bound to glutathione sepharose beads and mixed with purified bacterially expressed Ypt32 protein (in buffer B, see Methods). After incubation of the interaction mix (left), the GST-Myo2-GTD and GST were precipitated (right) and their presence was detected using immuno-blot analysis and anti-GST antibodies (bottom). Co-precipitation of Ypt32 was detected using immuno-blot analysis and anti-Ypt31/32 antibodies (top). Ypt32 co-precipitates with GST-Myo2-GTD, but not with GST. Results shown in this figure represent two independent experiments.

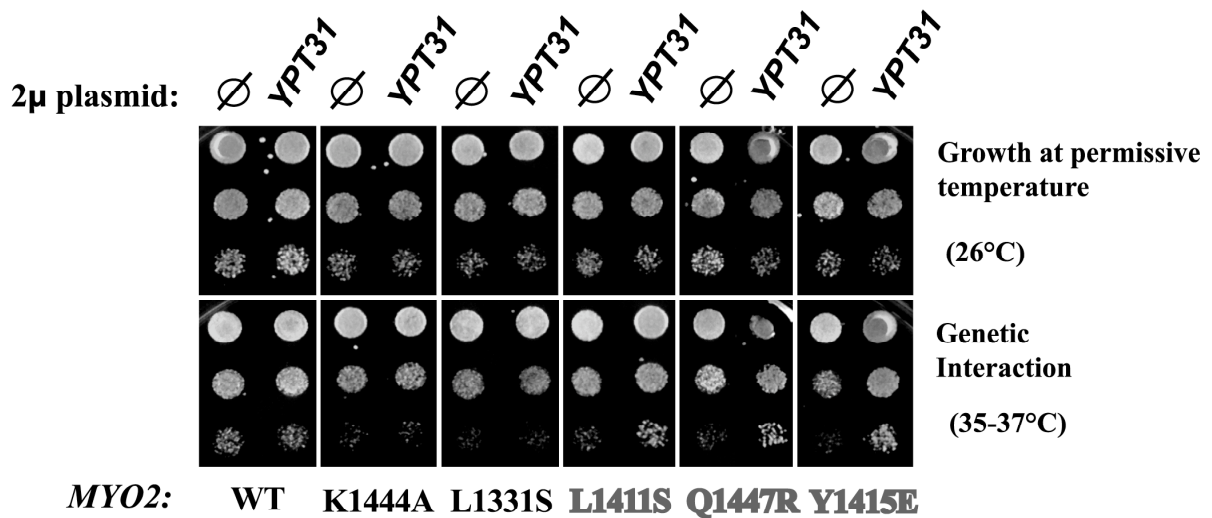

**Figure S3. Ypt31 over-expression suppression effect on *myo2* mutant cells is specific to *myo2* alleles compromised in Ypt31-interaction.** The experiment was done as explained in Figure 5C legend, except that different *MYO2* alleles were used. For each *myo2* mutant strain, the empty vector control (Botstein *et al.*) is shown on the left, and the over-expression of Ypt31 is shown on the right. The growth phenotype of Myo2 alleles that do not disrupt the Ypt31-Myo2-GTD yeast-two-hybrid interaction (Figure 3B) cannot be suppressed by over-expression of Ypt31. In contrast, alleles that compromise the interaction can be suppressed by over-expression of Ypt31. Results shown in this figure represent at least two experiments.

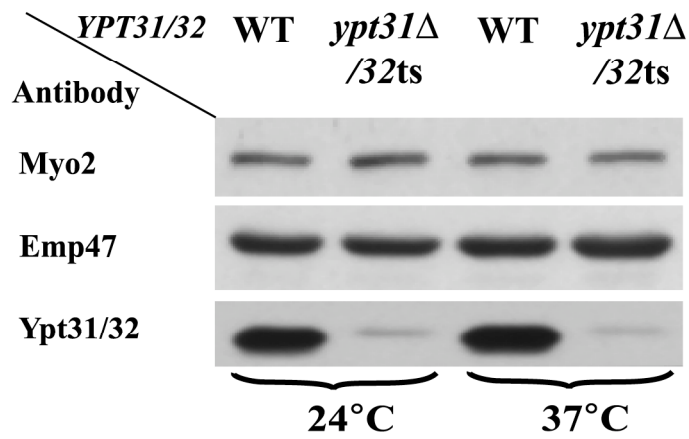

**Figure S4. The protein level of Myo2 does not change in *ypt31Δ/32ts* mutant cells.** Cells were grown as described in the legend for Figure 6A and cell lysates were prepared as described in Methods. The level of Myo2, EMP47 (as a loading control) and Ypt32 was determined using immuno-blot analysis and specific antibodies. In *ypt31Δ/32ts* mutant cells the level of Myo2 does not change, whereas the level of Ypt32 is reduced.

## References:

Botstein, D., Falco, S.C., Stewart, S.E., Brennan, M., Scherer, S., Stinchcomb, D.T., Struhl, K., and Davis, R.W. (1979). Sterile host yeasts (SHY): a eukaryotic system of biological containment for recombinant DNA experiments. *Gene* 8, 17-24.

Calero, M., Chen, C.Z., Zhu, W., Winand, N., Havas, K.A., Gilbert, P.M., Burd, C.G., and Collins, R.N. (2003). Dual prenylation is required for Rab protein localization and function. *Molecular biology of the cell* 14, 1852-1867.

Calero, M., and Collins, R.N. (2002). *Saccharomyces cerevisiae* Pra1p/Yip3p interacts with Yip1p and Rab proteins. *Biochemical and biophysical research communications* 290, 676-681.

Catlett, N.L., and Weisman, L.S. (1998). The terminal tail region of a yeast myosin-V mediates its attachment to vacuole membranes and sites of polarized growth. *Proceedings of the National Academy of Sciences of the United States of America* 95, 14799-14804.

Chen, S.H., Chen, S., Tokarev, A.A., Liu, F., Jedd, G., and Segev, N. (2005). Ypt31/32 GTPases and their novel F-box effector protein Rcy1 regulate protein recycling. *Molecular biology of the cell* 16, 178-192.

Christianson, T.W., Sikorski, R.S., Dante, M., Shero, J.H., and Hieter, P. (1992). Multifunctional yeast high-copy-number shuttle vectors. *Gene* 110, 119-122.

Durfee, T., Becherer, K., Chen, P.L., Yeh, S.H., Yang, Y., Kilburn, A.E., Lee, W.H., and Elledge, S.J. (1993). The retinoblastoma protein associates with the protein phosphatase type 1 catalytic subunit. *Genes & development* 7, 555-569.

Gimeno, R.E., Espenshade, P., and Kaiser, C.A. (1995). SED4 encodes a yeast endoplasmic reticulum protein that binds Sec16p and participates in vesicle formation. *The Journal of cell biology* 131, 325-338.

Guan, K.L., and Dixon, J.E. (1991). Eukaryotic proteins expressed in *Escherichia coli*: an improved thrombin cleavage and purification procedure of fusion proteins with glutathione S-transferase. *Analytical biochemistry* 192, 262-267.

James, P., Halladay, J., and Craig, E.A. (1996). Genomic libraries and a host strain designed for highly efficient two-hybrid selection in yeast. *Genetics* 144, 1425-1436.

Jedd, G., Mulholland, J., and Segev, N. (1997). Two new Ypt GTPases are required for exit from the yeast trans-Golgi compartment. *The Journal of cell biology* 137, 563-580.

Jedd, G., Richardson, C., Litt, R., and Segev, N. (1995). The Ypt1 GTPase is essential for the first two steps of the yeast secretory pathway. *The Journal of cell biology* 131, 583-590.



Jones, S., Jedd, G., Kahn, R.A., Franzusoff, A., Bartolini, F., and Segev, N. (1999). Genetic interactions in yeast between Ypt GTPases and Arf guanine nucleotide exchangers. *Genetics* 152, 1543-1556.

Jones, S., Newman, C., Liu, F., and Segev, N. (2000). The TRAPP complex is a nucleotide exchanger for Ypt1 and Ypt31/32. *Molecular biology of the cell* 11, 4403-4411.

Lupashin, V.V., and Waters, M.G. (1997). t-SNARE activation through transient interaction with a rab-like guanosine triphosphatase. *Science (New York, N.Y)* 276, 1255-1258.

Morozova, N., Liang, Y., Tokarev, A.A., Chen, S.H., Cox, R., Andrejic, J., Lipatova, Z., Sciorra, V.A., Emr, S.D., and Segev, N. (2006). TRAPP II subunits are required for the specificity switch of a Ypt-Rab GEF. *Nature cell biology* 8, 1263-1269.

Pashkova, N., Catlett, N.L., Novak, J.L., Wu, G., Lu, R., Cohen, R.E., and Weisman, L.S. (2005). Myosin V attachment to cargo requires the tight association of two functional subdomains. *The Journal of cell biology* 168, 359-364.

Pashkova, N., Jin, Y., Ramaswamy, S., and Weisman, L.S. (2006). Structural basis for myosin V discrimination between distinct cargoes. *The EMBO journal* 25, 693-700.

Sikorski, R.S., and Hieter, P. (1989). A system of shuttle vectors and yeast host strains designed for efficient manipulation of DNA in *Saccharomyces cerevisiae*. *Genetics* 122, 19-27.
